# Supplementary material
Source: PubMed Central journal article supplement (PMC10416421)
Supplement: NIHMS1907378-supplement-1.pdf [file NIHMS1907378-supplement-1.pdf]

**Supplemental Table 1. Criteria used for ascertaining provider suspicion of pathogenicity**

|               | Evidence of Suspicion of Pathogenicity                                                                                                                                                                                                                                                                                                                                                                                                                                                                                                | No Evidence of Suspicion of Pathogenicity                                                                                                                                                                                                                                                                                                                                                                                                                                                                                                                                       |
|---------------|---------------------------------------------------------------------------------------------------------------------------------------------------------------------------------------------------------------------------------------------------------------------------------------------------------------------------------------------------------------------------------------------------------------------------------------------------------------------------------------------------------------------------------------|---------------------------------------------------------------------------------------------------------------------------------------------------------------------------------------------------------------------------------------------------------------------------------------------------------------------------------------------------------------------------------------------------------------------------------------------------------------------------------------------------------------------------------------------------------------------------------|
| General       | <ul style="list-style-type: none"> <li>• Mention of other labs' classifications as pathogenic or likely pathogenic</li> <li>• Molecular diagnosis mentions that variant is possibly pathogenic or likely pathogenic</li> <li>• Option for "genetic testing recommended for deleterious mutation" marked (if no additional known deleterious P/LP variant is identified)</li> <li>• Molecular diagnosis describes variant as "suspicious"</li> <li>• Clinical or molecular diagnosis mentions possible influence of variant</li> </ul> | <ul style="list-style-type: none"> <li>• Molecular diagnosis of "[gene name] VUS" without evidence of suspicion</li> <li>• No additional screening beyond general population guidelines recommended for associated cancers</li> <li>• No genetic testing recommended for family members</li> <li>• Molecular diagnosis of "[gene name] mutation" when a known pathogenic variant was also identified, without mention of other variant</li> <li>• When a known pathogenic variant was also identified, genetic testing recommended only for known pathogenic variant</li> </ul> |
| <i>CDKN2A</i> | <ul style="list-style-type: none"> <li>• Pancreatic cancer screening recommended without personal or family history of pancreatic cancer</li> <li>• Dermatology exam recommended without personal or family history of skin cancer</li> </ul>                                                                                                                                                                                                                                                                                         | <ul style="list-style-type: none"> <li>• Clinical diagnosis of "sporadic melanoma" or "sporadic pancreatic cancer"</li> <li>• Dermatology exam and VUS tracking studies recommended in context of family history of melanoma, without evidence of suspicion</li> <li>• Dermatology exam recommended in context of personal history of melanoma, without evidence of suspicion</li> </ul>                                                                                                                                                                                        |
| <i>CHEK2</i>  | <ul style="list-style-type: none"> <li>• Molecular diagnosis describes variant as "moderate risk"</li> <li>• Earlier or more frequent colonoscopies compared to general population in absence of personal or family history of colon cancer</li> </ul>                                                                                                                                                                                                                                                                                | <ul style="list-style-type: none"> <li>• General population colonoscopy guidelines recommended</li> <li>• Clinical diagnosis of "familial breast cancer" without evidence of suspicion</li> <li>• Clinical diagnosis of "sporadic colon cancer" without evidence of suspicion</li> </ul>                                                                                                                                                                                                                                                                                        |
| <i>MLH1</i>   | <ul style="list-style-type: none"> <li>• Earlier or more frequent colonoscopies compared to general population in absence of personal or family history of colon cancer</li> </ul>                                                                                                                                                                                                                                                                                                                                                    | <ul style="list-style-type: none"> <li>• Clinical diagnosis of "unexplained pancreatic cancer"</li> <li>• General population colonoscopy guidelines recommended</li> </ul>                                                                                                                                                                                                                                                                                                                                                                                                      |
| <i>MUTYH</i>  | <ul style="list-style-type: none"> <li>• Earlier or more frequent colonoscopies compared to general population in absence of personal or family history of colon cancer</li> </ul>                                                                                                                                                                                                                                                                                                                                                    | <ul style="list-style-type: none"> <li>• General population colonoscopy guidelines recommended</li> </ul>                                                                                                                                                                                                                                                                                                                                                                                                                                                                       |

|               |                                                                                                                           |                                                                                                                               |
|---------------|---------------------------------------------------------------------------------------------------------------------------|-------------------------------------------------------------------------------------------------------------------------------|
| <i>RAD51C</i> | <ul style="list-style-type: none"> <li>• Ovarian cancer screening and/or oophorectomy discussed or recommended</li> </ul> | <ul style="list-style-type: none"> <li>• Ovarian cancer screening and/or oophorectomy not discussed or recommended</li> </ul> |
| <i>TP53</i>   | <ul style="list-style-type: none"> <li>• Whole body MRI recommended without a clinical diagnosis of LFS</li> </ul>        | <ul style="list-style-type: none"> <li>• Clinical diagnosis of “sporadic breast cancer”</li> </ul>                            |

**Supplemental Table 2. Distribution of laboratory classifications of variants with conflicts when patient result was reported in 2014-2016**

| Variant                                                                    | Date    | Count | Testing Lab | Lab 1 | Lab 2 | Lab 3 | Lab 4 | Lab 5 | Lab 6 | Lab 7 | Lab 8 | Expert Panel |
|----------------------------------------------------------------------------|---------|-------|-------------|-------|-------|-------|-------|-------|-------|-------|-------|--------------|
| <b>APC</b><br><b>c.3920T&gt;A</b>                                          | 11/2014 | 1     | LPV         | P     | RF    | LB    |       |       |       |       |       |              |
|                                                                            | 12/2015 | 3     | LPV         | P     | RF    | RF    | RF    | VUS   |       |       |       |              |
|                                                                            | 3/2016  | 1     | LPV         | P     | RF    | RF    | RF    | VUS   | VUS   |       |       |              |
|                                                                            | 4/2016  | 1     | LPV         | P     | RF    | RF    | RF    | VUS   | VUS   |       |       |              |
|                                                                            | 6/2016  | 1     | LPV         | P     | RF    | RF    | RF    | VUS   | VUS   |       |       |              |
|                                                                            | 8/2016  | 1     | LPV         | P     | RF    | RF    | RF    | VUS   | VUS   |       |       |              |
|                                                                            | 11/2016 | 2     | LPV         | P     | RF    | RF    | RF    | VUS   | VUS   |       | LP    |              |
| <b>CDKN2A</b><br><b>c.146T&gt;C</b>                                        | 11/2014 | 1     | VUS         | LP    | VUS   | VUS   |       |       |       |       |       |              |
|                                                                            | 7/2015  | 1     | VUS         | LP    | VUS   | VUS   |       |       |       |       |       |              |
|                                                                            | 8/2015  | 1     | VUS         | LP    | VUS   | VUS   |       |       |       |       |       |              |
|                                                                            | 11/2015 | 2     | VUS         | LP    | VUS   | LB    |       |       |       |       |       |              |
|                                                                            | 1/2016  | 1     | VUS         | LP    | VUS   | LB    |       |       |       |       |       |              |
|                                                                            | 3/2016  | 1     | VUS         | LP    | VUS   | LB    |       |       |       |       |       |              |
|                                                                            | 4/2016  | 1     | VUS         | LP    | VUS   | LB    |       |       |       |       |       |              |
| <b>CHEK2</b><br><b>c.1283C&gt;T</b>                                        | 12/2014 | 1     | VUS         | P     | P     |       |       |       |       |       |       |              |
|                                                                            | 1/2015  | 1     | VUS         | P     | P     |       |       |       |       |       |       |              |
|                                                                            | 10/2016 | 1     | VUS         | P     | P     | P     | P     |       |       |       | P     |              |
|                                                                            | 11/2016 | 1     | VUS         | P     | P     | P     | P     |       |       |       | P     |              |
| <b>CHEK2</b><br><b>c.1427C&gt;T</b>                                        | 5/2015  | 1     | VUS         | LP    | P     |       |       |       |       |       |       |              |
|                                                                            | 3/2016  | 2     | VUS         | LP    | P     | VUS   | VUS   |       |       |       |       |              |
| <b>CHEK2</b><br><b>c.349A&gt;G</b>                                         | 8/2014  | 1     | VUS         | LP    | LP    |       |       |       |       |       |       |              |
|                                                                            | 9/2015  | 1     | VUS         | LP    | LP    |       |       |       |       |       |       |              |
| <b>CHEK2</b><br><b>c.470T&gt;C</b>                                         | 9/2014  | 1     | VUS         | P     | LP    |       |       |       |       |       |       |              |
|                                                                            | 3/2015  | 1     | VUS         | P     | LP    |       |       |       |       |       | P     |              |
|                                                                            | 5/2015  | 1     | VUS         | P     | LP    |       |       |       |       |       | P     |              |
|                                                                            | 7/2015  | 1     | VUS         | P     | LP    |       |       |       |       |       | P     |              |
|                                                                            | 3/2016  | 1     | VUS         | P     | LP    | P     | LP    |       |       |       | P     | LP           |
|                                                                            | 8/2016  | 1     | VUS         | P     | LP    | P     | LP    | VUS   |       |       | P     | LP           |
|                                                                            | 11/2016 | 1     | VUS         | P     | LP    | P     | LP    | VUS   | LP    |       | P     | LP           |
| <b>CHEK2</b><br><b>c.917G&gt;C</b>                                         | 11/2015 | 1     | VUS         | VUS   | LP    |       |       |       |       |       |       |              |
| <b>MLH1</b><br><b>c.191A&gt;G</b>                                          | 7/2016  | 1     | VUS         | LP    | VUS   | VUS   |       |       |       |       |       | LP           |
| <b>MSH2</b><br><b>c.1046C&gt;G</b>                                         | 1/2015  | 1     | VUS         |       |       |       |       |       |       |       |       | LP           |
| <b>MUTYH</b><br><b>c.857G&gt;A</b><br><b>MUTYH</b><br><b>c.934-2A&gt;G</b> | 12/2014 | 1     | VUS         |       | P     |       |       |       |       |       |       |              |
|                                                                            | 5/2015  | 2     | LP          | VUS   | P     | LP    |       |       |       |       |       |              |
|                                                                            | 6/2015  | 1     | LP          | VUS   | P     | LP    |       |       |       |       |       |              |
|                                                                            | 7/2015  | 2     | LP          | VUS   | P     | LP    |       |       |       |       |       |              |
|                                                                            | 8/2015  | 1     | LP          | VUS   | P     | LP    |       |       |       |       |       |              |

|                      |         |   |     |     |   |     |
|----------------------|---------|---|-----|-----|---|-----|
|                      | 10/2015 | 1 | LP  | VUS | P | LP  |
|                      | 6/2016  | 1 | LP  | VUS |   | LP  |
|                      | 11/2016 | 1 | LP  | VUS | P | LP  |
| <b>RAD51C</b>        |         |   |     |     |   |     |
| <b>c.965+5G&gt;A</b> | 9/2016  | 1 | VUS | LP  |   | VUS |
| <b>TP53</b>          |         |   |     |     |   |     |
| <b>c.1040C&gt;A</b>  | 9/2015  | 1 | VUS | LP  |   |     |
| <b>TP53</b>          |         |   |     |     |   |     |
| <b>c.374C&gt;T</b>   | 2/2016  | 1 | VUS | LP  |   | LP  |

Count equals the number of individuals found to have the variant in which their report was issued in the particular month. Total count equals 50. Testing Lab is the laboratory at which the patient was tested. Labs 1 through 8 are other major commercial laboratories that had classifications submitted to ClinVar reflecting the classification at the time of the patient's report, and Expert Panel is a ClinVar-defined expert panel that had a classification submitted to ClinVar reflecting the classification at the time of the patient's report. P refers to a pathogenic/deleterious classification. LP refers to a likely pathogenic/suspected deleterious classification. LB refers to a likely benign/favor polymorphism classification. RF refers to a classification of "risk factor," and LPV refers to a classification of "low penetrance variant." Both terms are used to describe low penetrance pathogenic variants.

**Supplemental Table 3.** Complete HGVS Nomenclature for Variants with Conflicts

| Gene                     | HGVS cDNA                 | HGVS gDNA (GRCh38)          | HGVS protein                 |
|--------------------------|---------------------------|-----------------------------|------------------------------|
| <i>APC</i>               | NM_000038.6:c.3920T>A     | NC_000005.10:g.112839514T>A | NP_000029.2:p.(Ile1307Lys)   |
| <i>CDKN2A</i>            | NM_000077.5:c.146T>C      | NC_000009.12:g.21974682A>G  | NP_000068.1:p.(Ile49Thr)     |
| <i>CHEK2</i>             | NM_007194.4:c.1283C>T     | NC_000022.11:g.28695219G>A  | NP_009125.1:p.(Ser428Phe)    |
| <i>CHEK2</i>             | NM_007194.4:c.1427C>T     | NC_000022.11:g.28694066G>A  | NP_009125.1:p.(Thr476Met)    |
| <i>CHEK2</i>             | NM_007194.4:c.349A>G      | NC_000022.11:g.28725338T>C  | NP_009125.1:p.(Arg117Gly)    |
| <i>CHEK2</i>             | NM_007194.4:c.470T>C      | NC_000022.11:g.28725099A>G  | NP_009125.1:p.(Ile157Thr)    |
| <i>CHEK2</i>             | NM_007194.4:c.917G>C      | NC_000022.11:g.28699929C>G  | NP_009125.1:p.(Gly306Ala)    |
| <i>MLH1</i>              | NM_000249.4:c.191A>G      | NC_000003.12:g.36996693A>G  | NP_000240.1:p.(Asn64Ser)     |
| <i>MSH2</i>              | NM_000251.3:c.1046C>G     | NC_000002.12:g.47416399C>G  | NP_000242.1:p.(Pro349Arg)    |
| <i>MUTYH<sup>a</sup></i> | NM_001128425.2:c.857G>A   | NC_000001.11:g.45332242C>T  | NP_001121897.1:p.(Gly286Glu) |
| <i>MUTYH<sup>b</sup></i> | NM_001128425.2:c.934-2A>G | NC_000001.11:g.45332088T>C  | NP_001121897.1:p.?           |
| <i>MUTYH<sup>a</sup></i> | NM_001048174.2:c.773G>A   | NC_000001.11:g.45332242C>T  | NP_001041639.1:p.(Gly258Glu) |
| <i>MUTYH<sup>b</sup></i> | NM_001048174.2:c.850-2A>G | NC_000001.11:g.45332088T>C  | NP_001041639.1:p.?           |
| <i>RAD51C</i>            | NM_058216.3:c.965+5G>A    | NC_000017.11:g.58724105G>A  | NP_478123.1:p.?              |
| <i>TP53</i>              | NM_000546.6:c.1040C>A     | NC_000017.11:g.7670669G>T   | NP_000537.3:p.(Ala347Asp)    |
| <i>TP53</i>              | NM_000546.6:c.374C>T      | NC_000017.11:g.7675995G>A   | NP_000537.3:p.(Thr125Met)    |

<sup>a</sup>These two variants are the same variant described using different transcripts. <sup>b</sup>These two variants are the same variant described using different transcripts. <sup>a,b</sup>NM\_001128425.2 was utilized by the testing laboratory, and NM\_001048174.2 is the MANE transcript.

**Supplemental Table 4. Counseling strategy for patients with discrepant classifications of the same variant seen by the same provider**

**(A) *CDKN2A* c.146T>C, Provider 1**

|                                                        | <b>VUS (1/2016)</b>                 | <b>Likely Pathogenic (12/2016)</b>                  |
|--------------------------------------------------------|-------------------------------------|-----------------------------------------------------|
| <b>Gender</b>                                          | Female                              | Female                                              |
| <b>Age at Testing</b>                                  | 32                                  | 59                                                  |
| <b>Personal History</b>                                | Uterine cancer                      | Pancreatic cancer                                   |
| <b>Family History of <i>CDKN2A</i>-Related Cancers</b> | First-degree relative with melanoma | First-degree relative with pancreatic cancer        |
| <b>Additional Variants</b>                             | None                                | <i>NBN</i> VUS                                      |
| <b>Dermatology Exam</b>                                | Continue/begin now, repeat yearly   | Baseline evaluation now, repeat as indicated        |
| <b>Pancreatic Cancer Screening</b>                     | None                                | None <sup>a</sup>                                   |
| <b>Family Member Testing</b>                           | VUS tracking studies                | Targeted variant testing for first-degree relatives |

<sup>a</sup>No screening was recommended while undergoing treatment for metastatic cancer.

**(B) *CHEK2* c.470T>C, Provider 2**

|                                                       | <b>Pathogenic (12/2015)</b>                                                                                | <b>VUS (8/2016)</b>                                                                                                          | <b>Pathogenic (1/2017)</b>                                                                                 |
|-------------------------------------------------------|------------------------------------------------------------------------------------------------------------|------------------------------------------------------------------------------------------------------------------------------|------------------------------------------------------------------------------------------------------------|
| <b>Gender</b>                                         | Female                                                                                                     | Male                                                                                                                         | Female                                                                                                     |
| <b>Age at Testing</b>                                 | 47                                                                                                         | 66                                                                                                                           | 58                                                                                                         |
| <b>Personal History</b>                               | None                                                                                                       | Colon cancer                                                                                                                 | Breast cancer and pancreatic cancer                                                                        |
| <b>Family History of <i>CHEK2</i>-Related Cancers</b> | Two first-degree relatives with DCIS; three second-degree and one third-degree relative with breast cancer | First-degree relative with colon cancer; second-degree relative with colon cancer; second-degree relative with breast cancer | Third-degree relative with breast cancer; second-, third-, and fourth-degree relatives with thyroid cancer |
| <b>Additional Variants</b>                            | None                                                                                                       | <i>APC</i> VUS                                                                                                               | VUSs in <i>GALNT12</i> , <i>NBN</i> , and <i>TYR</i>                                                       |
| <b>Mammogram</b>                                      | Continue/begin now, repeat yearly                                                                          | N/A                                                                                                                          | None <sup>a</sup>                                                                                          |

|                              |                                          |                   |                                                                 |
|------------------------------|------------------------------------------|-------------------|-----------------------------------------------------------------|
| <b>Breast MRI</b>            | Continue/begin now, repeat yearly        | N/A               | None <sup>a</sup>                                               |
| <b>Colonoscopy</b>           | Continue/begin now, repeat every 5 years | None <sup>a</sup> | None <sup>a</sup>                                               |
| <b>Family Member Testing</b> | None <sup>b</sup>                        | None <sup>c</sup> | Targeted variant testing recommended for first-degree relatives |

<sup>a</sup>No screening was recommended while undergoing treatment for metastatic cancer.

<sup>b</sup>Other at-risk family members had previously undergone testing; patient's testing was recommended due to this variant being found in family members.

<sup>c</sup>No additional relatives had previously undergone testing.

**(C) *CHEK2* c.470T>C, Provider 3**

|                                                       | VUS (11/2016)                         | Pathogenic (4/2018)                                 |
|-------------------------------------------------------|---------------------------------------|-----------------------------------------------------|
| <b>Gender</b>                                         | Female                                | Female                                              |
| <b>Age at Testing</b>                                 | 39                                    | 36                                                  |
| <b>Personal History</b>                               | Breast DCIS                           | Gastric cancer                                      |
| <b>Family History of <i>CHEK2</i>-Related Cancers</b> | None                                  | One second-degree relative with colon cancer        |
| <b>Additional Variants</b>                            | <i>NBN</i> VUS                        | <i>RAD50</i> and <i>RECQL4</i> VUSs                 |
| <b>Mammogram</b>                                      | Continue/begin now, repeat yearly     | Begin at age 40, repeat yearly                      |
| <b>Breast MRI</b>                                     | Not recommended                       | Begin at age 40, repeat yearly                      |
| <b>Colonoscopy</b>                                    | Begin at age 40, repeat every 5 years | Begin at age 40, repeat every 5 years               |
| <b>Family Member Testing</b>                          | None                                  | Targeted variant testing for first-degree relatives |

**(D) *MUTYH* c.934-2A>G, Provider 1**

|                                                  | VUS (2/2019)  | Likely Pathogenic (12/2018)              |
|--------------------------------------------------|---------------|------------------------------------------|
| <b>Gender</b>                                    | Female        | Female                                   |
| <b>Age at Testing</b>                            | 48            | 51                                       |
| <b>Personal History</b>                          | Breast cancer | None                                     |
| <b>Family History of Colon Cancer and Polyps</b> | None          | Second-degree relative with colon cancer |

|                              |                                    |                                                       |
|------------------------------|------------------------------------|-------------------------------------------------------|
| <b>Additional Variants</b>   | <i>DICER1</i> and <i>MSH6</i> VUSs | <i>BAP1</i> VUS                                       |
| <b>Colonoscopy</b>           | Not discussed                      | Continue/begin now, repeat every 5 years              |
| <b>Family Member Testing</b> | None                               | Targeted variant testing suggested for family members |

**(E) *MUTYH* c.934-2A>G, Provider 2**

|                                                  | VUS (12/2016)  | Likely Pathogenic (11/2016)                                                                         |
|--------------------------------------------------|----------------|-----------------------------------------------------------------------------------------------------|
| <b>Gender</b>                                    | Female         | Female                                                                                              |
| <b>Age at Testing</b>                            | 70             | 47                                                                                                  |
| <b>Personal History</b>                          | Ovarian cancer | None                                                                                                |
| <b>Family History of Colon Cancer and Polyps</b> | None           | None                                                                                                |
| <b>Additional Variants</b>                       | None           | <i>CDKN2A</i> , <i>CHEK2</i> , and <i>MSH2</i> VUSs                                                 |
| <b>Colonoscopy</b>                               | Not discussed  | Continue/begin now, repeat every 5 years                                                            |
| <b>Family Member Testing</b>                     | None           | Targeted variant testing for siblings and children; panel for sister with additional cancer history |
